# Supplementary material
Source: PubMed Central journal article supplement (PMC6796859)
Supplement: 41422_2019_189_MOESM5_ESM.pdf [file 41422_2019_189_MOESM5_ESM.pdf]

# Figure S5

**a**

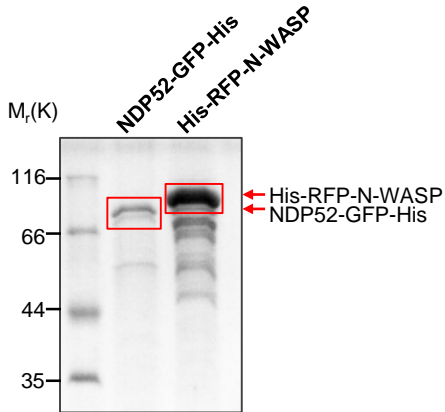

**b**

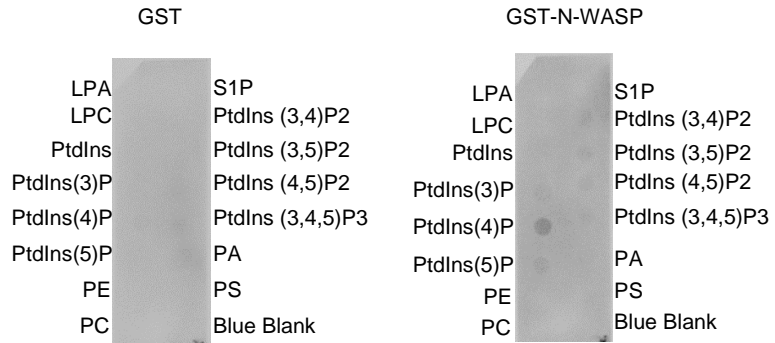

## Figure S5. Purified NDP52 and N-WASP recombinant proteins for TIRFM.

**a** NDP52-GFP-His and His-RFP-N-WASP proteins were purified from BL21 E. coli, subjected to SDS-PAGE and stained with Coomassie Brilliant Blue. **b** PIP strip assays of purified GST and GST-N-WASP proteins. The phospholipid strip membranes were incubated with GST or GST-N-WASP protein and then probed with anti-GST and secondary antibodies.
